# Supplementary material
Source: Springer Nature journal article supplement (https://www.springermedizin.de/resource/supplementary/13014_2009_223_MOESM1_ESM.pdf/9633210)

DVH PTV

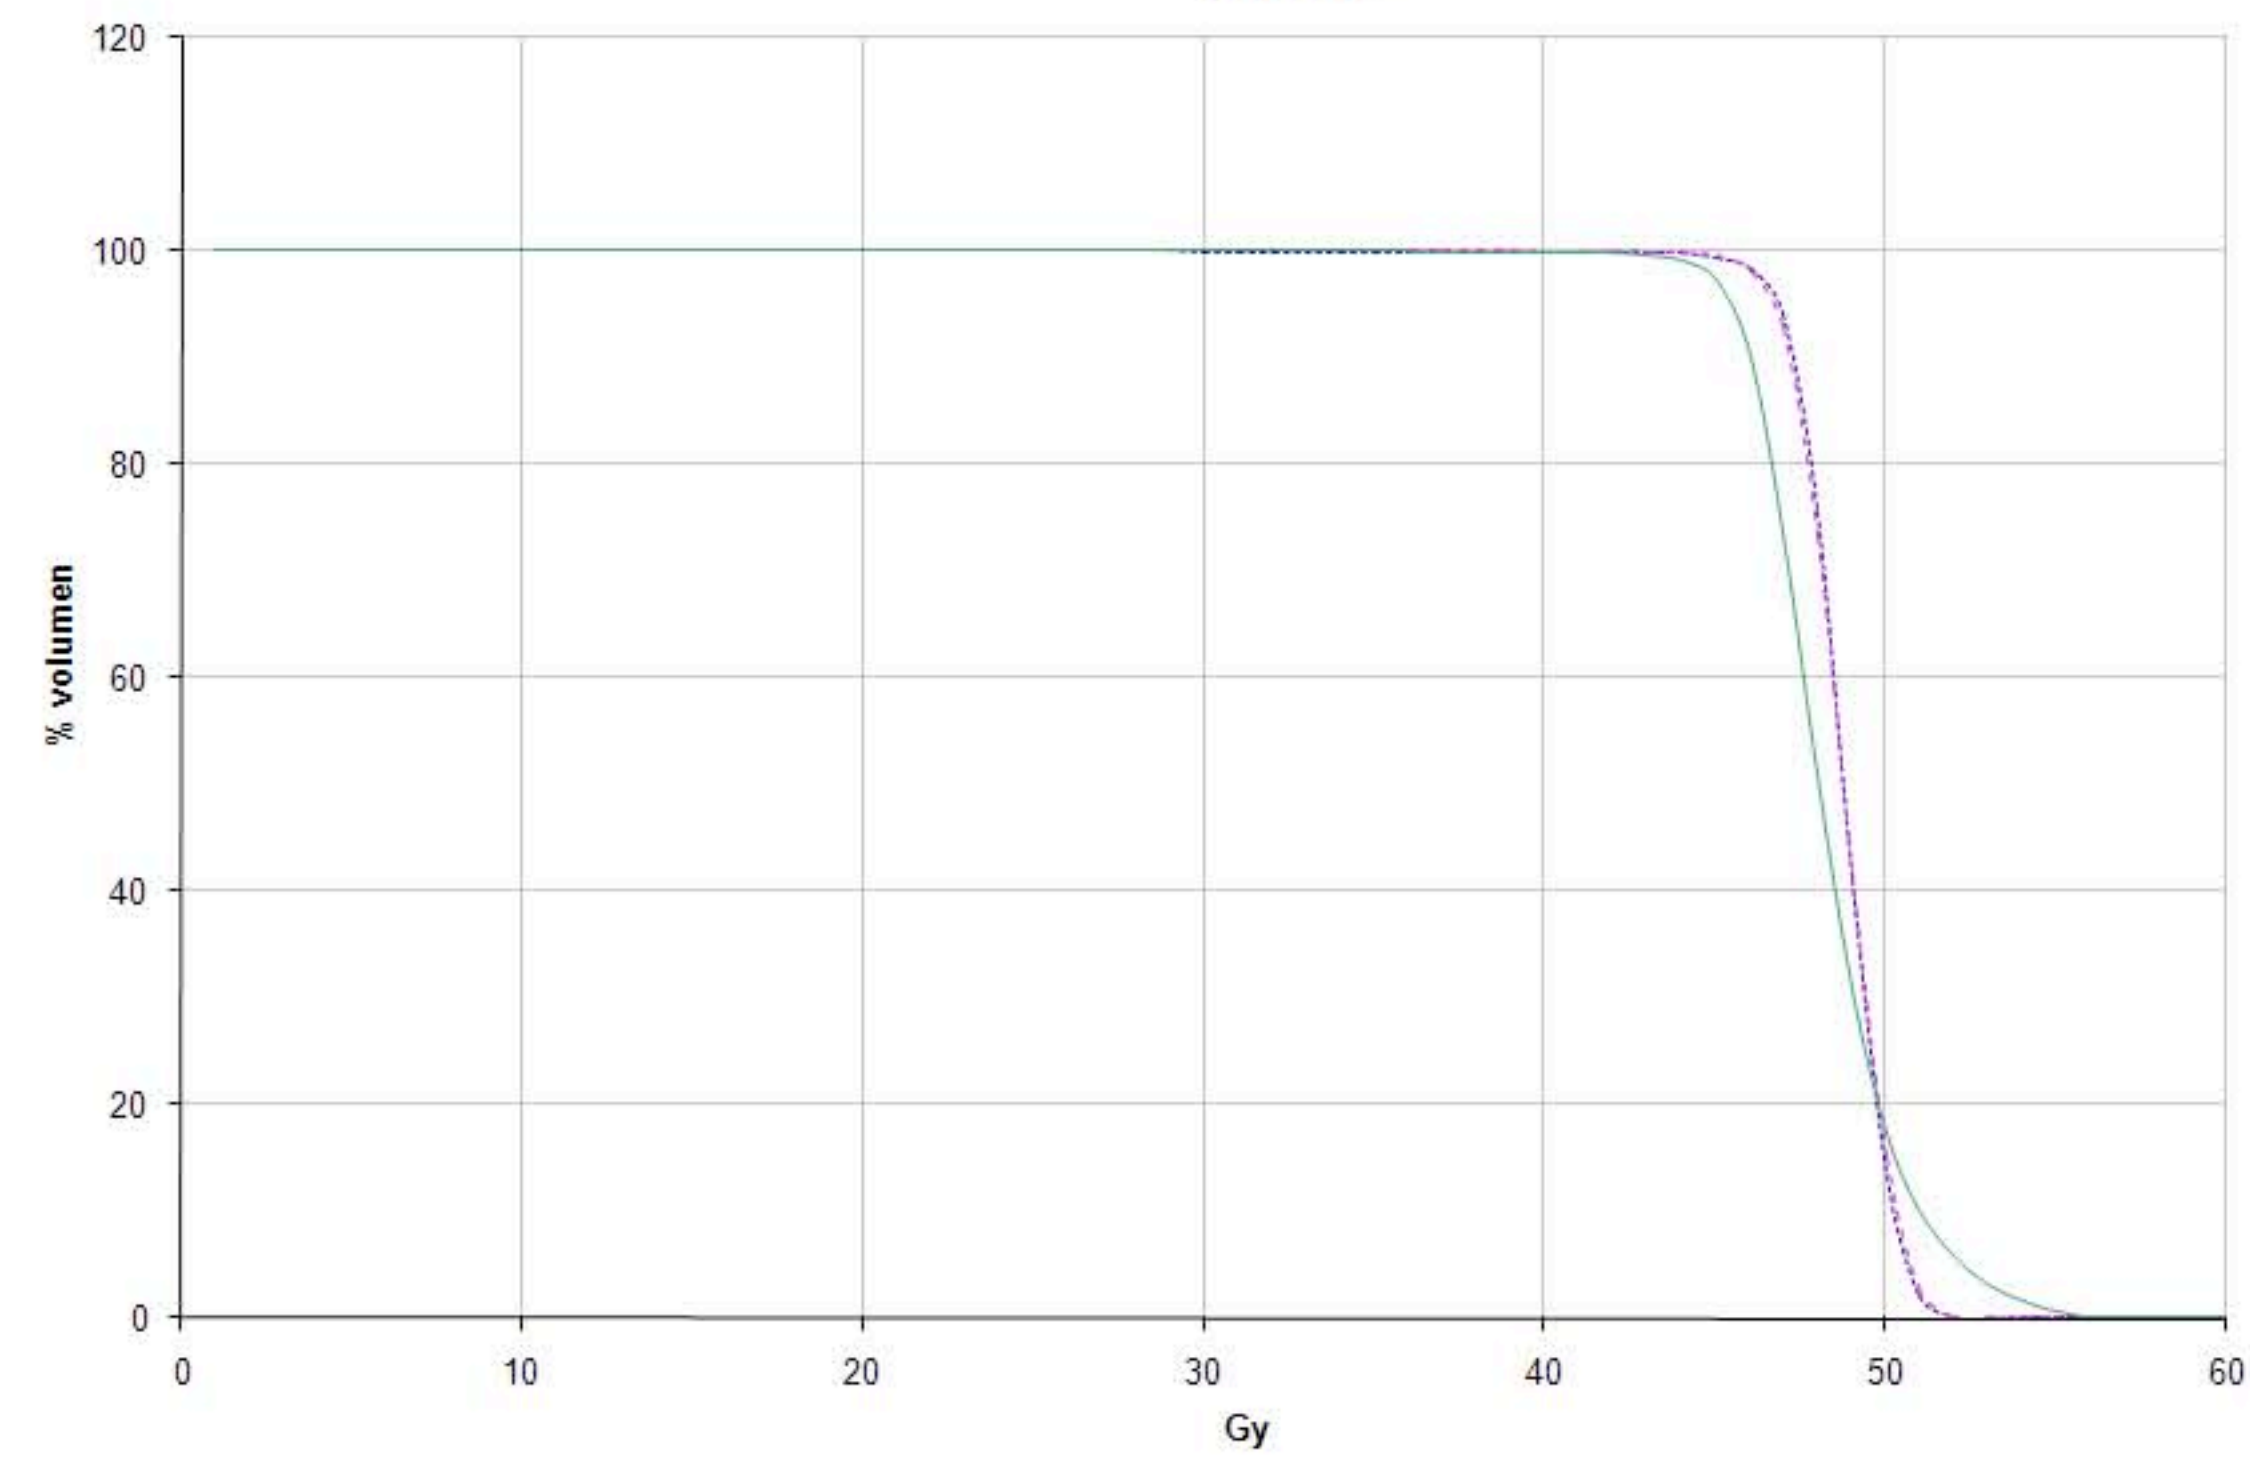

DVH CTV

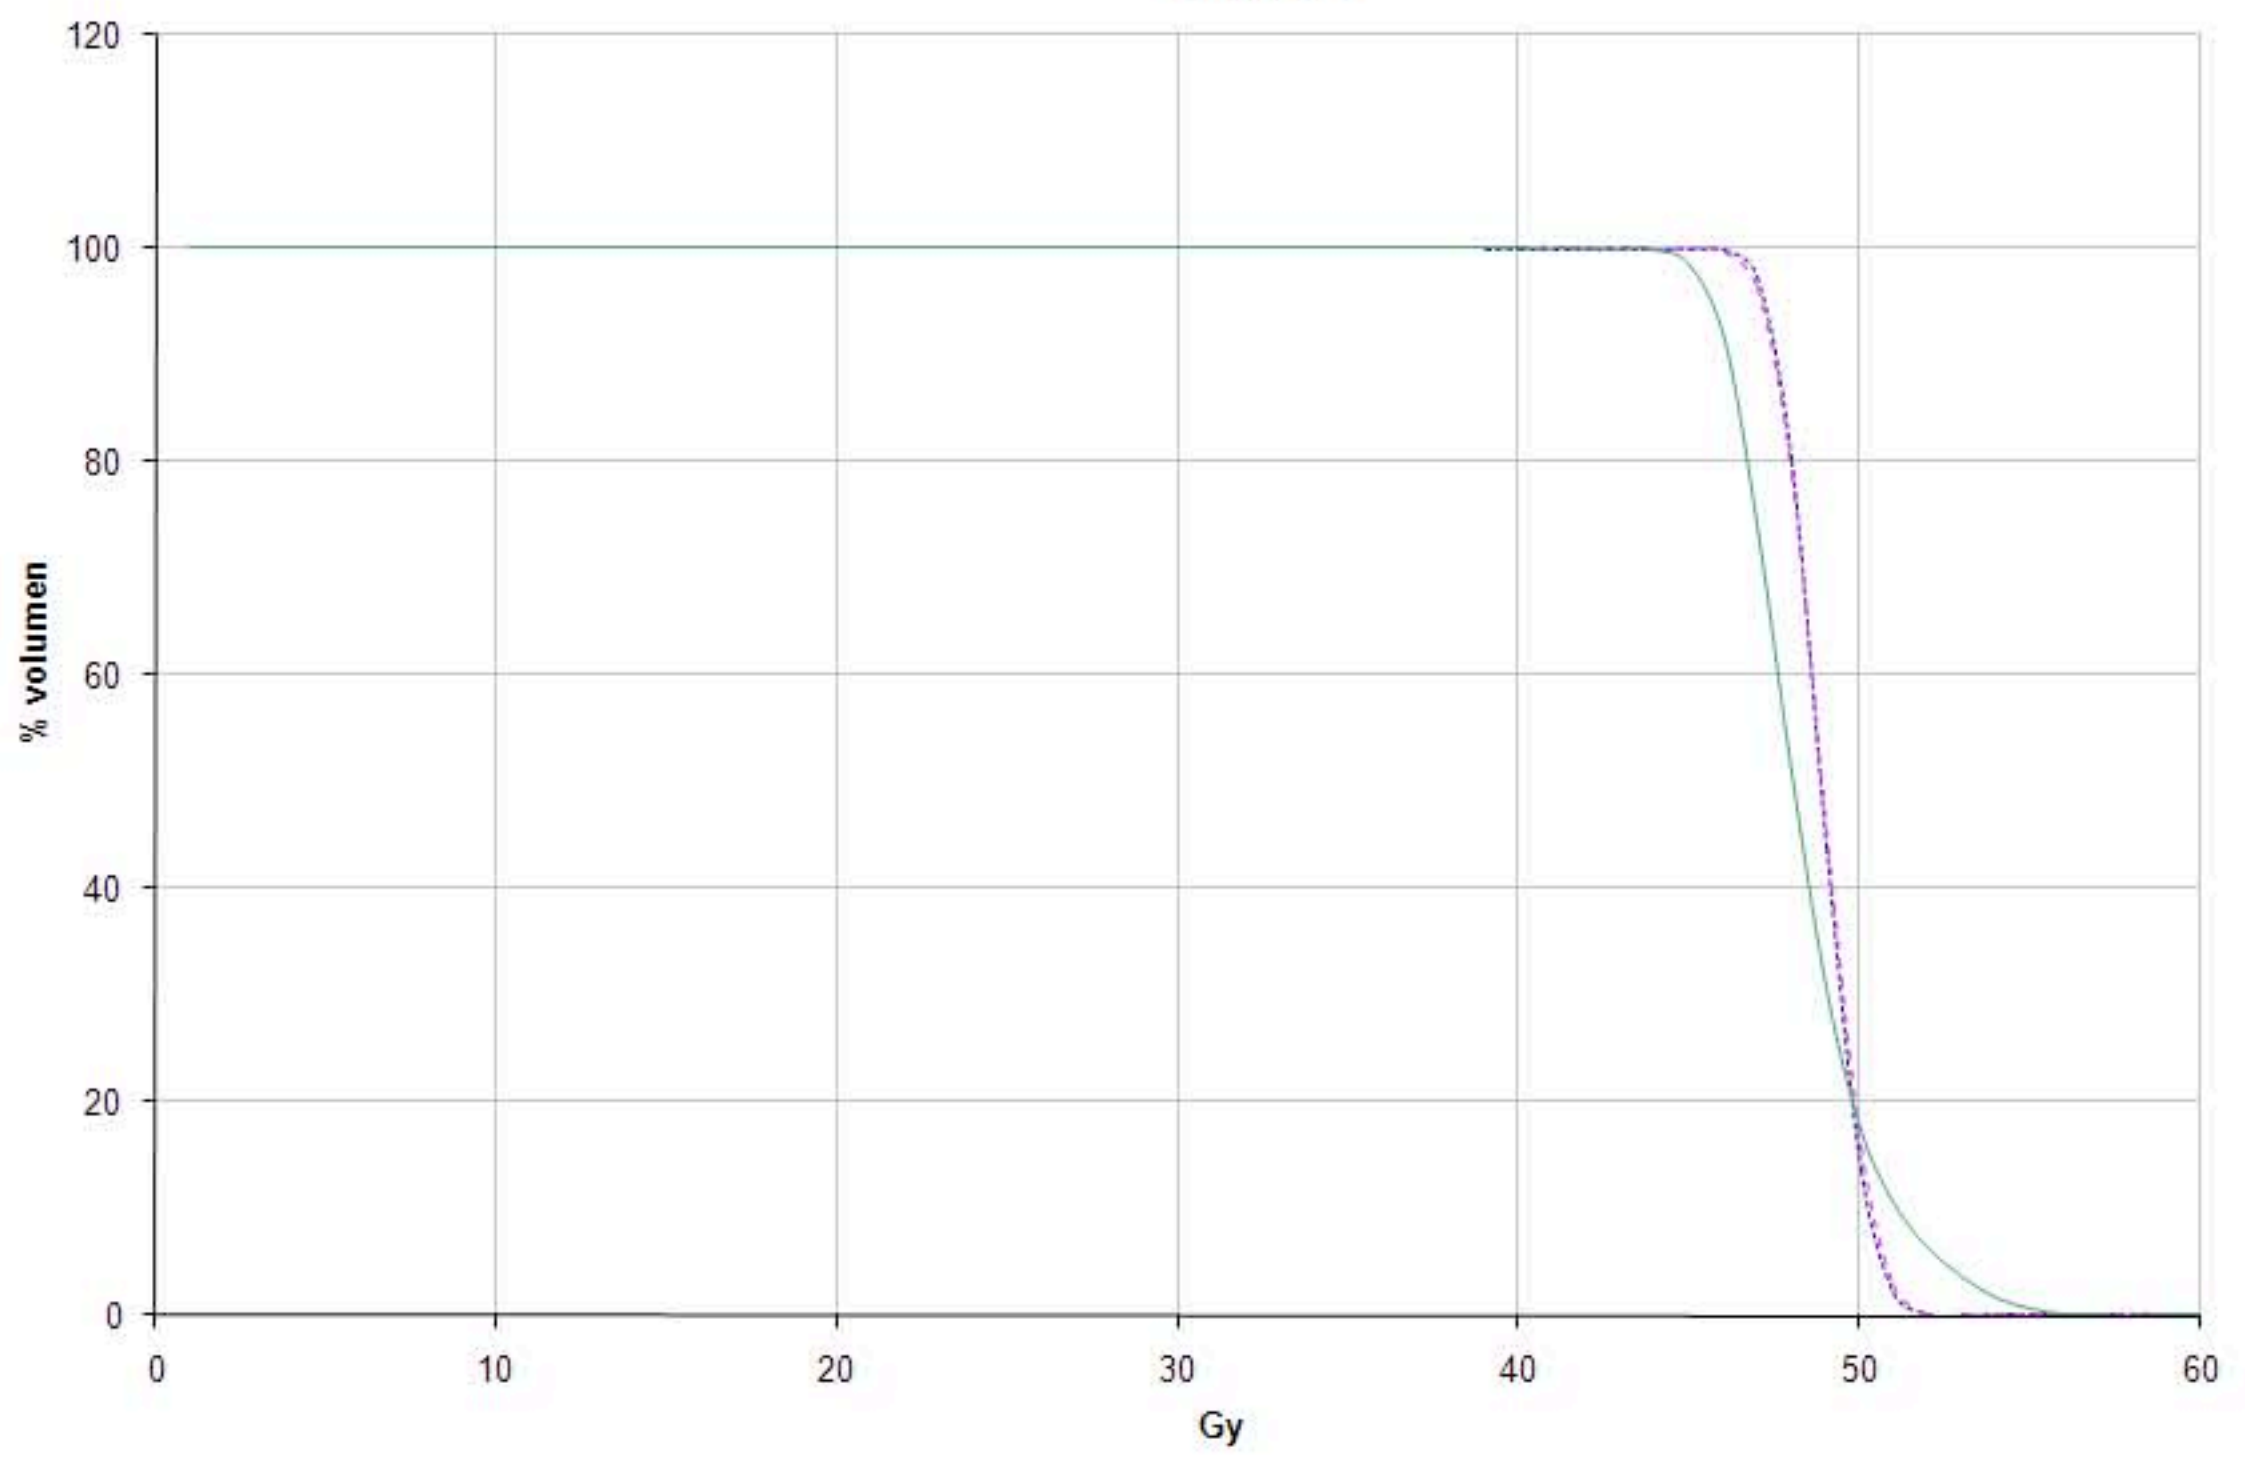

DVH GTV

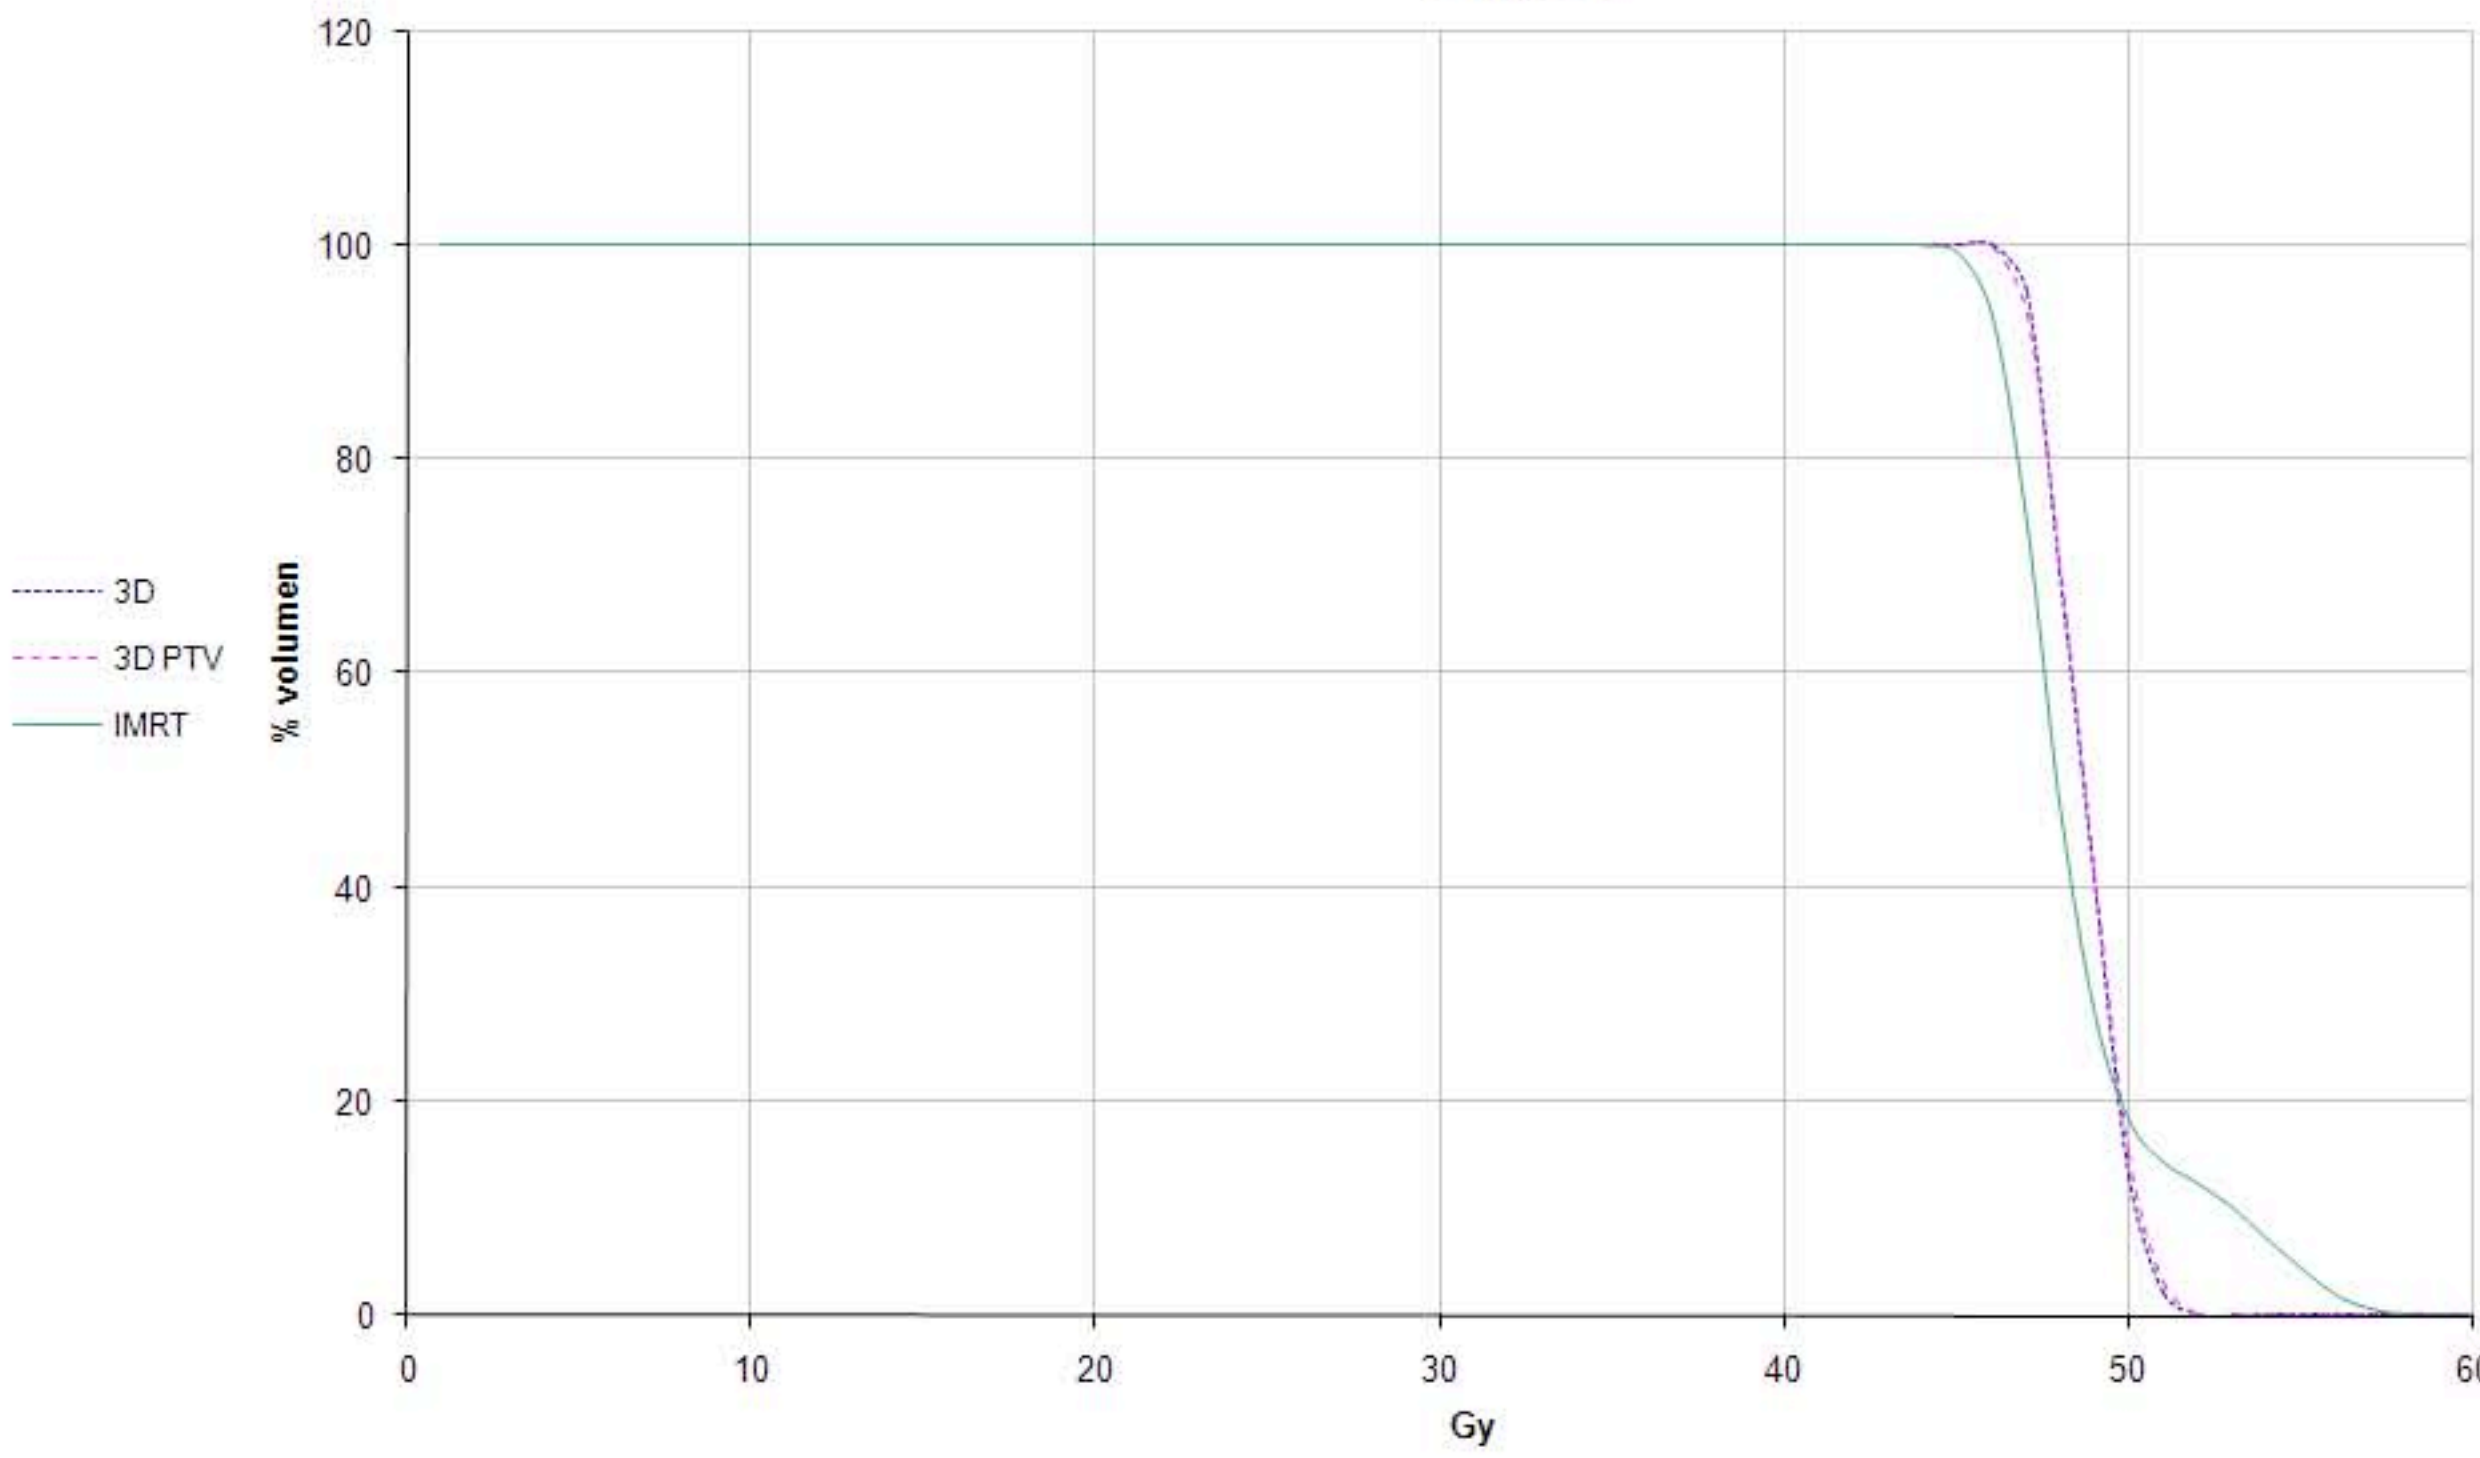

Supplement: MOESM1 [file 9633210]
